# Supplementary material for: Investigating Clinical Teachers’ Adoption Intention and Use Behavior of AI-Assisted Teaching: An Extended UTAUT2 Model Approach Author：
Source: Research Square preprint supplement (doi:10.21203/rs.3.rs-6885241/v1), 2025-09-03
Supplement: Supplementary file 1 [file 7c1c915de42457414ef3b130.docx]

Descriptive statistics for scale items (N=335, Mean ± SD).

| Dimension | Item | Score (Mean±SD) |
| --- | --- | --- |
| Performance Expectancy (PE) | 1. Using AI-assisted teaching can improve my teaching efficiency. | 4.29±0.76 |
|  | 2. Using AI-assisted teaching can enhance student learning outcomes. | 4.17±0.81 |
|  | 3. Using AI-assisted teaching can enrich teaching content and methods. | 4.32±0.73 |
|  | 4. AI-assisted teaching is useful for my teaching work. | 4.27±0.77 |
| Effort Expectancy (EE) | 5. Learning to use AI-assisted teaching tools is easy for me. | 2.15±0.84 |
|  | 6. Interacting with AI-assisted teaching tools is clear and understandable. | 2.26±0.87 |
|  | 7. I find AI-assisted teaching tools easy to use. | 2.25±0.82 |
| Social Influence (SI) | 8. People important to me think I should use AI-assisted teaching. | 3.95±0.80 |
|  | 9. People whose opinions I value would recommend AI-assisted teaching. | 3.99±0.78 |
|  | 10. My colleagues frequently use AI-assisted teaching. | 3.97±0.81 |
| Facilitating Conditions (FC) | 11. I have the resources needed to use AI-assisted teaching. | 3.12±1.11 |
|  | 12. I have the knowledge needed to use AI-assisted teaching. | 3.01±1.09 |
|  | 13. AI-assisted teaching tools are compatible with other systems I use. | 3.11±1.13 |
|  | 14. Specialized help is available if I have difficulties with AI. | 3.07±1.15 |
| Price Value (PV) | 15. AI-assisted teaching tools are reasonably priced. | 3.88±0.79 |
|  | 16. AI-assisted teaching tools are good value for money. | 3.79±0.82 |
|  | 17. At the current price, AI-assisted teaching offers good features. | 3.85±0.78 |
| Hedonic Motivation (HM) | 18. Using AI-assisted teaching is fun. | 3.98±0.80 |
|  | 19. Using AI-assisted teaching is enjoyable. | 4.03±0.79 |
|  | 20. Using AI-assisted teaching is very entertaining. | 4.02±0.81 |
| Perceived Risk (PR) | 21. I worry about data privacy when using AI-assisted teaching. ® | 3.15±0.95 |
|  | 22. I worry AI might negatively impact teaching quality. ® | 3.08±0.97 |
|  | 23. I worry AI might reduce teacher-student interaction. ® | 3.06±0.94 |
| Cognitive Trust (CT) | 24. I believe AI-assisted teaching systems are reliable. | 3.58±0.77 |
|  | 25. I believe AI-assisted teaching systems are professional. | 3.61±0.75 |
|  | 26. I believe AI-assisted teaching systems can effectively assist teaching. | 3.62±0.74 |
| Habit (HAB) | 27. Using AI-assisted teaching has become a habit for me. | 3.22±1.06 |
|  | 28. I am addicted to using AI-assisted teaching. | 3.29±1.04 |
|  | 29. I must use AI-assisted teaching. | 3.27±1.05 |
| Adoption Intention (BI) | 30. I intend to use AI-assisted teaching in the next semester. | 3.93±0.71 |
| Use Behavior (UB) | 31. How often do you use AI to generate teaching materials? | 2.32±1.04 |
|  | 32. How often do you use AI for intelligent Q&A with students? | 2.28±1.03 |
|  | 33. How often do you use AI for personalized learning path recommendation? | 2.31±1.05 |
| ® indicates item was reverse-scored for PR construct calculation if necessary (though PR mean is given directly in text). Actual items from DOCX should be used for this table. | | |
